# Supplementary material
Source: publisher site journal article supplement (http://kjim.org/upload/media/kjim-2021-088-suppl7.pdf)
Supplement: Supplementary file 1 [file kjim-2021-088-suppl7.pdf]

**Supplementary Table 7. Clinical outcomes stratified by sex**

| Variable                             | Women (n = 12) | Men (n = 38) | p value |
|--------------------------------------|----------------|--------------|---------|
| All-cause mortality during follow-up | 5 (41.7)       | 6 (15.8)     | 0.105   |
| Stroke                               | 6 (50.0)       | 10 (26.3)    | 0.163   |
| Driveline infection                  | 1 (8.3)        | 7 (18.4)     | 0.661   |
| Gastrointestinal bleeding            | 6 (50.0)       | 7 (18.4)     | 0.055   |
| Major bleeding                       | 8 (66.6)       | 18 (47.3)    | 0.243   |
| Postop bleeding control surgery      | 2 (16.6)       | 5 (13.1)     | 1.000   |
| Device malfunction                   | 0              | 1 (2.6)      | 1.000   |
| Postoperative RHF                    | 6 (50.0)       | 5 (13.1)     | 0.014   |
| Inotropic weaning failure            | 5 (41.6)       | 3 (7.8)      | 0.014   |
| Inotropic restart or multidrug       | 2 (16.6)       | 2 (5.2)      | 0.240   |
| RVAD insertion                       | 2 (16.6)       | 2 (5.2)      | 0.240   |

Values are presented as number (%).

RHF, right heart failure; RVAD, right ventricular assist device.
